# Supplementary material for: Anti-leishmanial study of discrete tetrahedral zinc(ii) β-oxodithioester complexes
Source: Royal Society of Chemistry journal article supplement (doi:10.1039/d4nj04275a), 2024-11-26
Supplement: d4nj04275a1.pdf [file d4nj04275a1.pdf]

## Anti-leishmanial Study of Discrete Tetrahedral Zinc(II) $\beta$ -oxodithioester Complexes†

Chote Lal Yadav,<sup>a</sup> Anamika,<sup>a</sup> Rajan Singh,<sup>c</sup> Akhilesh Kumar,<sup>d</sup> Rakesh K. Singh,<sup>c</sup> Michael G. B. Drew,<sup>e</sup> Krishna K. Manar,<sup>a,b\*</sup> Nanhai Singh,<sup>a\*</sup>

<sup>a</sup>Department of Chemistry, Institute of Science, Banaras Hindu University, Varanasi 221005, India. E-mail: nsingh@bhu.ac.in, nsinghbhu@gmail.com

<sup>b</sup>Department of Chemistry, Faculty of Science, University of Allahabad, Prayagraj – 211002, U.P. (India). E-mail:kkmanar@allduniv.ac.in, krishnamanar@gmail.com

<sup>c</sup>Department of Biochemistry, Institute of Science, Banaras Hindu University, Varanasi 221005, India

<sup>d</sup>Department of Chemistry and Nano Science, Ewha Womans University, Seoul-03760, Korea,

<sup>e</sup>Department of Chemistry, University of Reading, Whiteknights, Reading, RG6 6AD, UK

| Contents in Supporting Information |                                                                                                    |          |
|------------------------------------|----------------------------------------------------------------------------------------------------|----------|
| Heading                            | Content                                                                                            | Page No. |
| Figure S1                          | Potassium salts of $\beta$ -oxodithioester ligands KL1–KL4.                                        | 3        |
| Figure S2                          | <sup>1</sup> H NMR spectrum of complex <b>1</b> in DMSO- <i>d</i> <sub>6</sub> .                   | 3        |
| Figure S3                          | <sup>13</sup> C{ <sup>1</sup> H} NMR spectrum of complex <b>1</b> in DMSO- <i>d</i> <sub>6</sub> . | 4        |
| Figure S4                          | <sup>1</sup> H NMR spectrum of complex <b>2</b> in DMSO- <i>d</i> <sub>6</sub> .                   | 4        |
| Figure S5                          | <sup>13</sup> C{ <sup>1</sup> H} NMR spectrum of complex <b>2</b> in DMSO- <i>d</i> <sub>6</sub> . | 5        |
| Figure S6                          | <sup>19</sup> F NMR spectrum of complex <b>2</b> in DMSO- <i>d</i> <sub>6</sub> .                  | 5        |
| Figure S7                          | <sup>1</sup> H NMR spectrum of complex <b>3</b> in DMSO- <i>d</i> <sub>6</sub> .                   | 6        |
| Figure S8                          | <sup>13</sup> C{ <sup>1</sup> H} NMR spectrum of complex <b>3</b> in DMSO- <i>d</i> <sub>6</sub> . | 6        |
| Figure S9                          | <sup>1</sup> H NMR spectrum of complex <b>4</b> in DMSO- <i>d</i> <sub>6</sub> .                   | 7        |
| Figure S10                         | <sup>13</sup> C{ <sup>1</sup> H} NMR spectrum of complex <b>4</b> in DMSO- <i>d</i> <sub>6</sub> . | 7        |

|            |                                                                                                                                                                                                                                                                                                       |       |
|------------|-------------------------------------------------------------------------------------------------------------------------------------------------------------------------------------------------------------------------------------------------------------------------------------------------------|-------|
| Figure S11 | Simulated PXRD (in black, generated from single crystal data) and experimental (in red) patterns of complexes <b>1</b> , <b>2</b> , and <b>4</b> .                                                                                                                                                    | 8     |
| Figure S12 | Representation of the C—H... $\pi$ (ZnOSC <sub>3</sub> , chelate) interactions: $d$ is the distance between the ring centroid (Cg) of the chelate ring and the H atom; V1 is the vector normal to the plane through the ring; $\beta$ is the C—H...CG angle; $\alpha$ is the angle between V1 and V2. | 9     |
| Figure S13 | Supramolecular structure of complex <b>1</b> sustained by C—H...O, C—H...S and C—H...H—C interactions.                                                                                                                                                                                                | 9     |
| Figure S14 | Supramolecular structure of complex <b>1</b> sustained by (a) C—H... $\pi$ (ZnOSC <sub>3</sub> ,chelate), (b) C—S... $\pi$ (ZnOSC <sub>3</sub> , chelate), and (c) $\pi$ ... $\pi$ (ZnOSC <sub>3</sub> ,) interactions.                                                                               | 10-11 |
| Figure S15 | Supramolecular structure of complex <b>2</b> sustained by C—H... $\pi$ (ZnOSC <sub>3</sub> , chelate) interactions.                                                                                                                                                                                   | 11    |
| Figure S16 | Supramolecular structure of complex <b>2</b> sustained by C—S... $\pi$ (chelate) interactions.                                                                                                                                                                                                        | 12    |
| Figure S17 | Supramolecular structure of complex <b>2</b> sustained by C—H...F interactions.                                                                                                                                                                                                                       | 12    |
| Figure S18 | Supramolecular structure of complex <b>4</b> sustained by C—H... $\pi$ (ZnOSC <sub>3</sub> , chelate) interactions.                                                                                                                                                                                   | 13    |
| Figure S19 | Supramolecular structure of complex <b>4</b> sustained by C—S... $\pi$ (ZnOSC <sub>3</sub> , chelate) and $\pi$ ... $\pi$ interactions.                                                                                                                                                               | 13-14 |

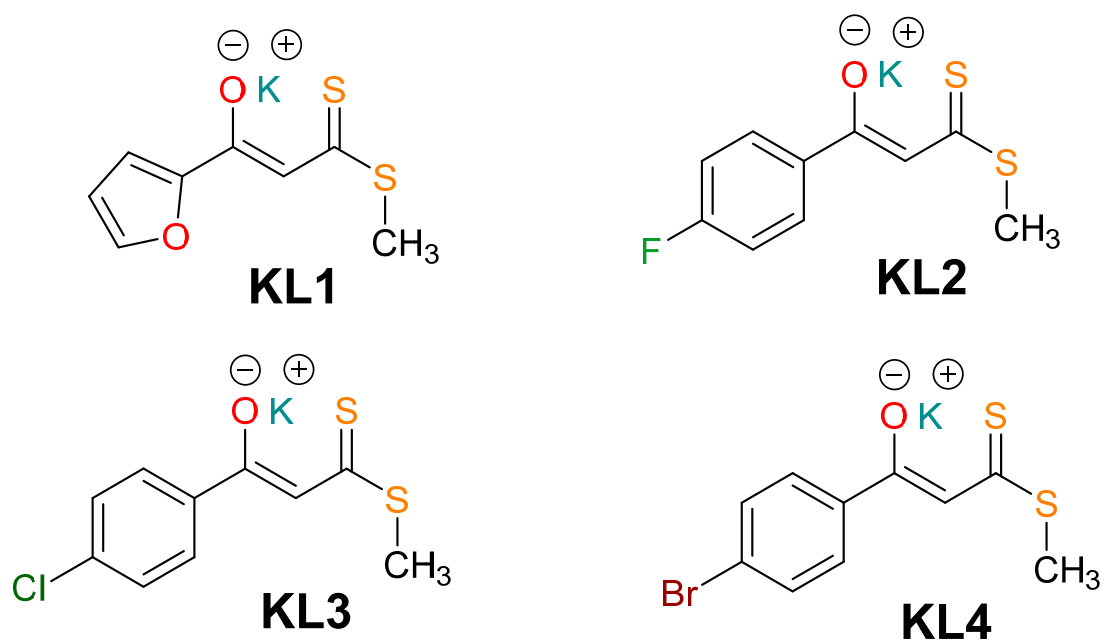

**Figure S1.** Potassium salts of  $\beta$ -oxodithioester ligands KL1–KL4.

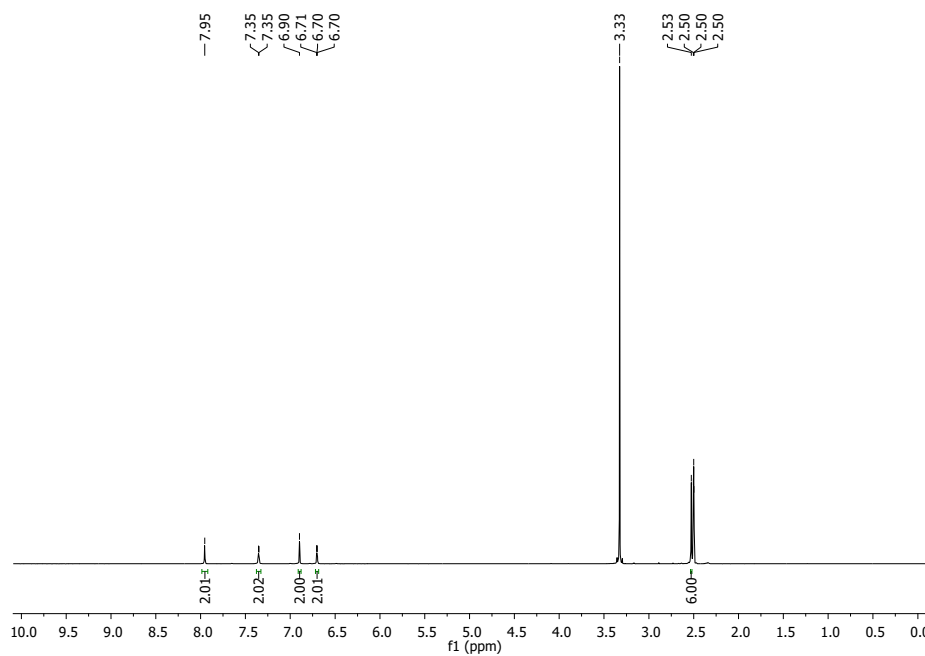

**Figure S2.**  $^1\text{H}$  NMR spectrum of complex **1** in  $\text{DMSO}-d_6$ .

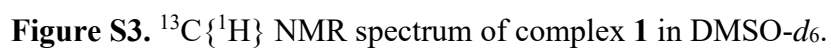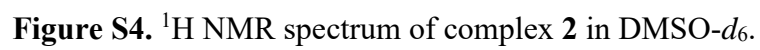

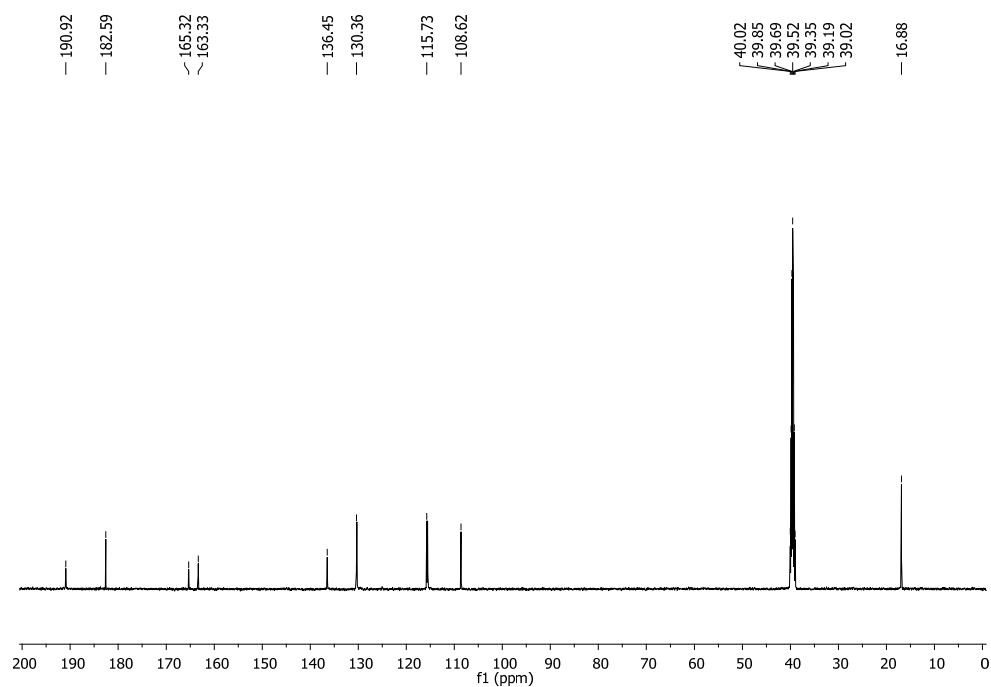

**Figure S5.**  $^{13}\text{C}\{^1\text{H}\}$  NMR spectrum of complex **2** in  $\text{DMSO-}d_6$ .

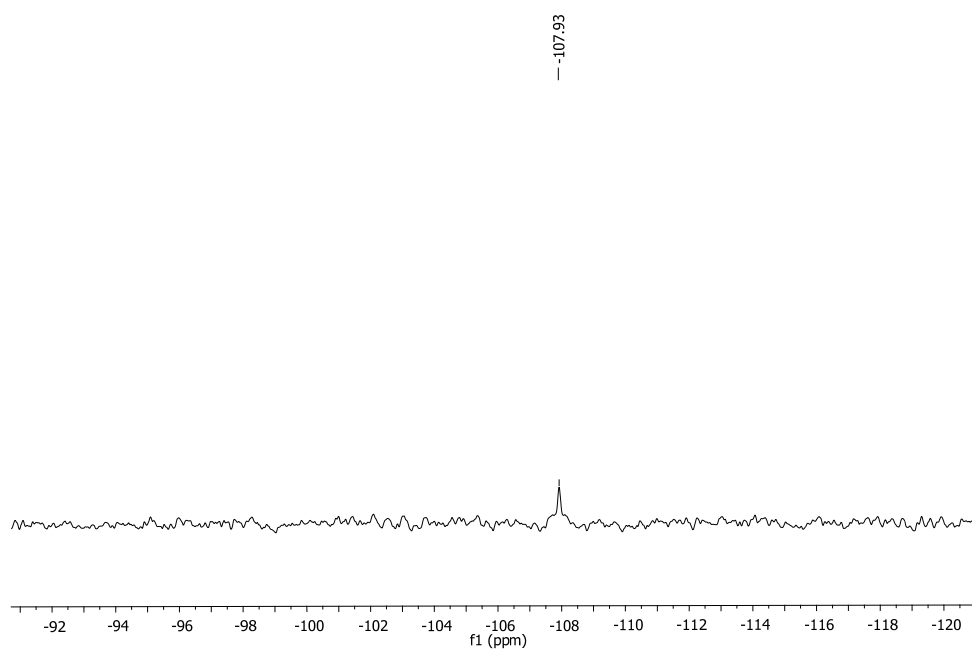

**Figure S6.**  $^{19}\text{F}$  NMR spectrum of complex **2** in  $\text{DMSO-}d_6$ .

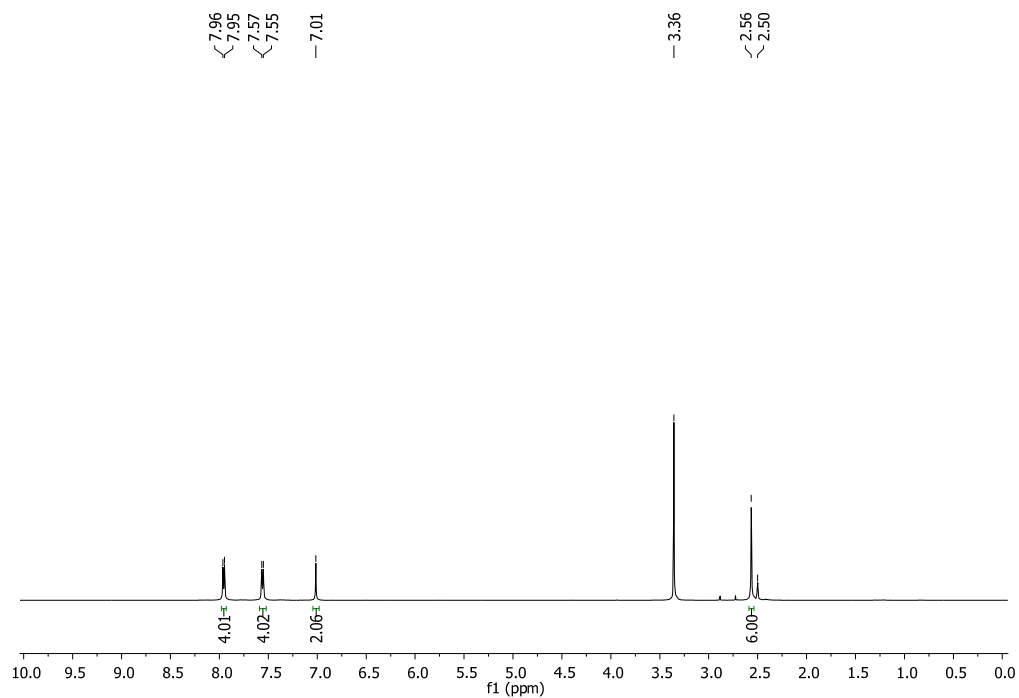

**Figure S7.**  $^1\text{H}$  NMR spectrum of complex **3** in  $\text{DMSO-}d_6$ .

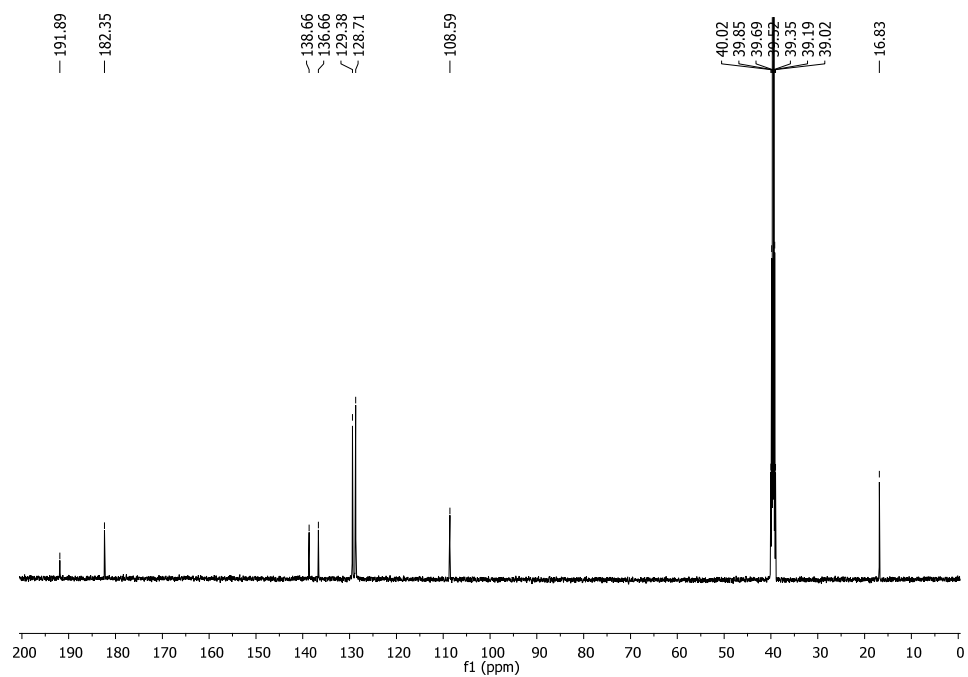

**Figure S8.**  $^{13}\text{C}\{^1\text{H}\}$  NMR spectrum of complex **3** in  $\text{DMSO-}d_6$ .

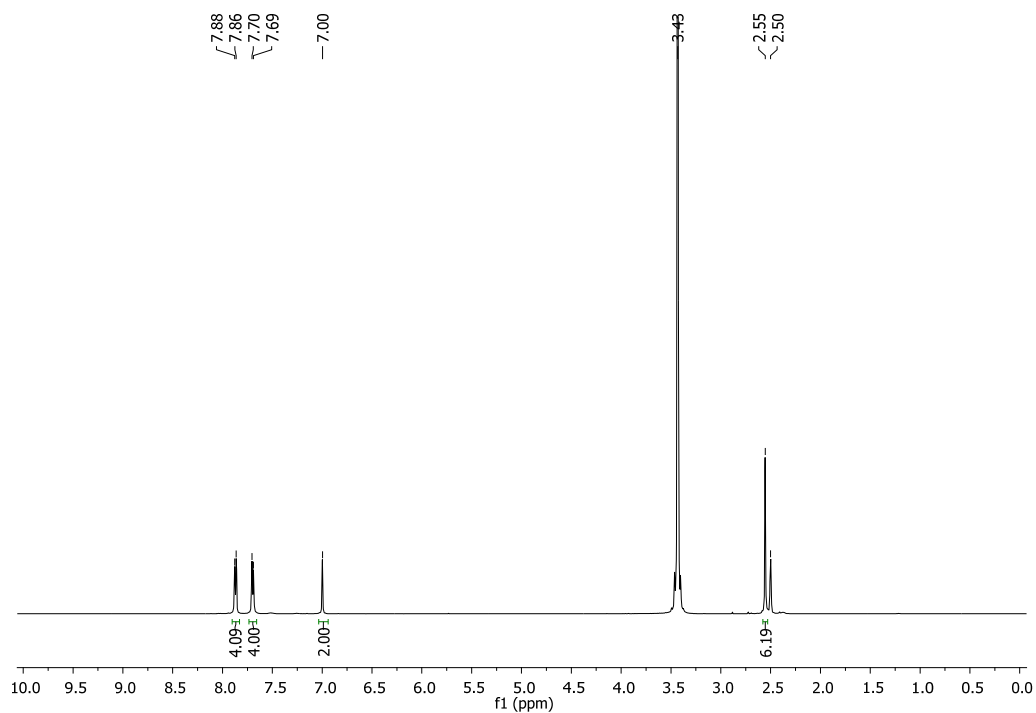

**Figure S9.** <sup>1</sup>H NMR spectrum of complex 4 in DMSO-*d*<sub>6</sub>.

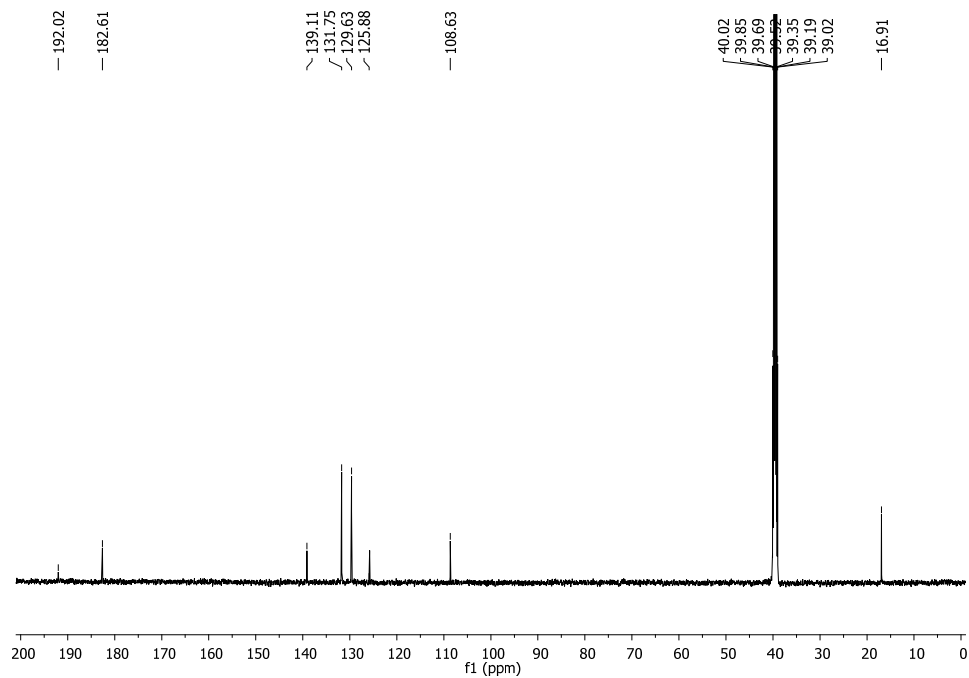

**Figure S10.** <sup>13</sup>C{<sup>1</sup>H} NMR spectrum of complex 4 in DMSO-*d*<sub>6</sub>.

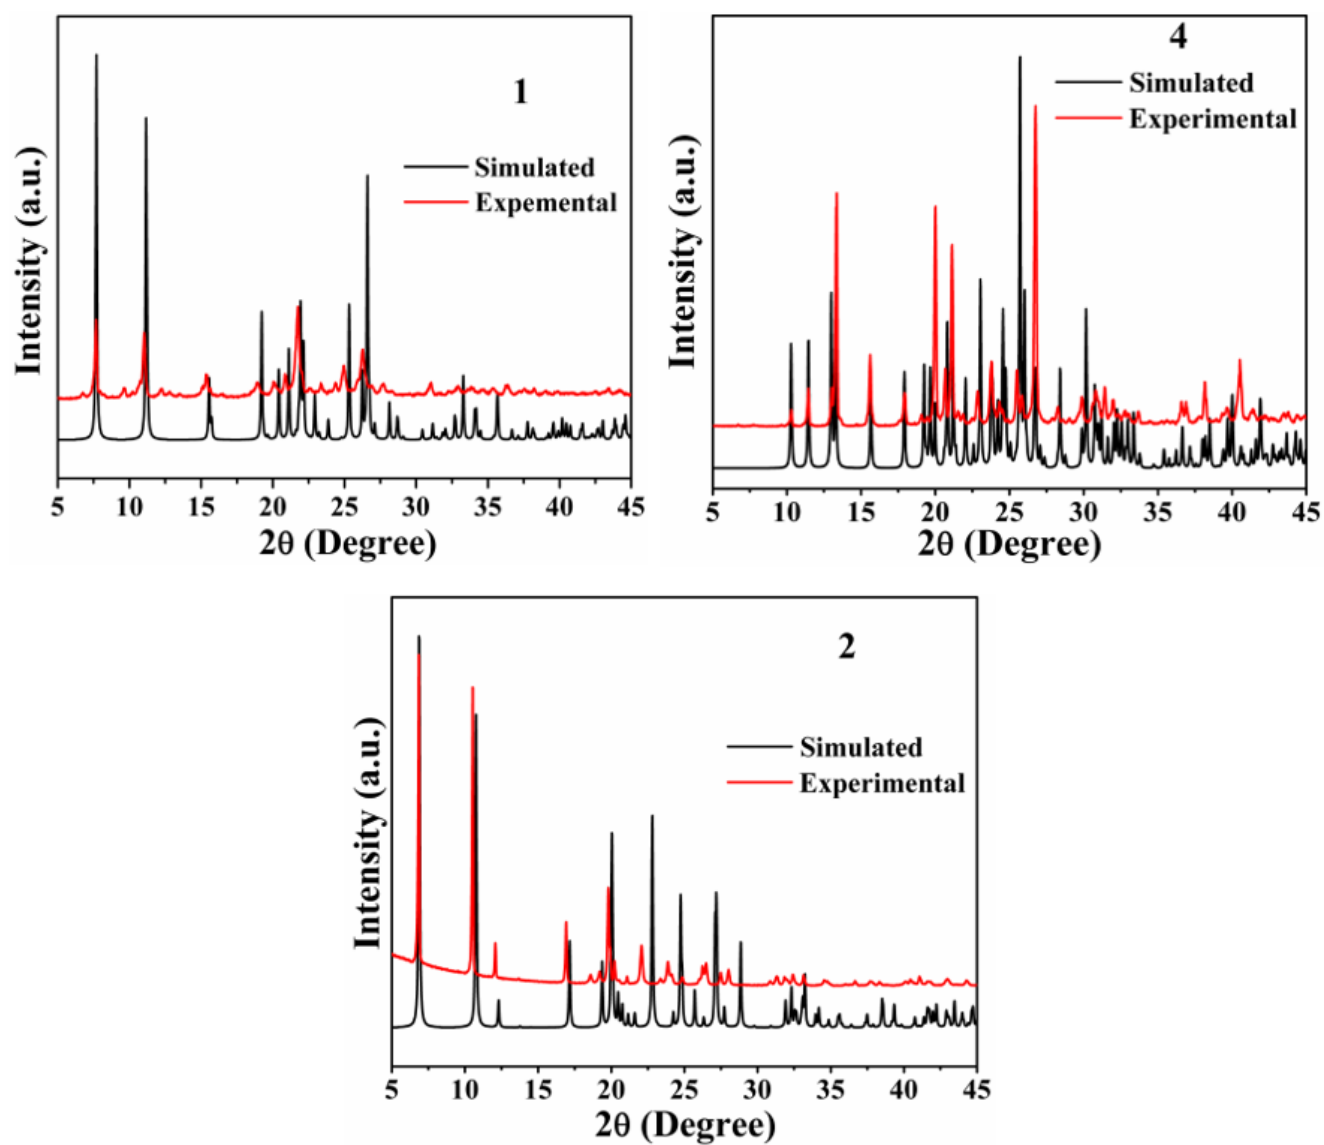

**Figure S11.** Simulated PXRD (in black, generated from single crystal data) and experimental (in red) patterns of complexes **1**, **2**, and **4**.



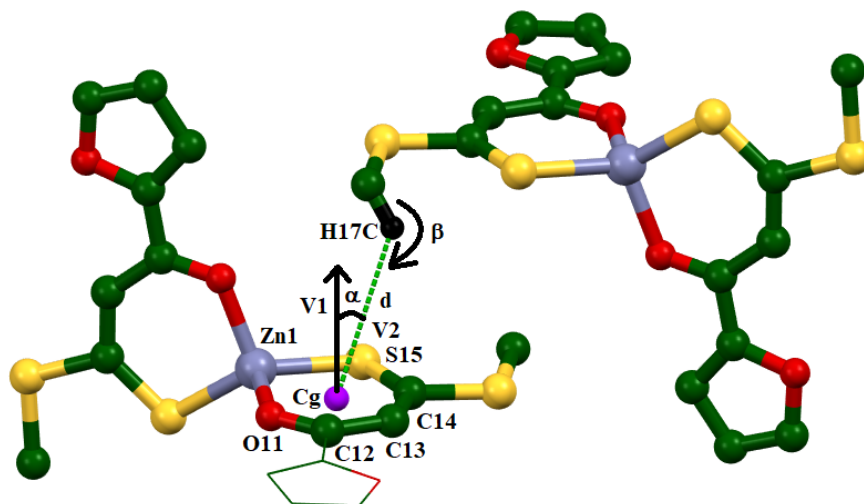

**Figure S12.** Representation of the C—H $\cdots$  $\pi$  (ZnOSC<sub>3</sub>, chelate) interactions with only the major component of the -SMe group shown:  $d$  is the distance between the ring centroid (Cg) of the chelate ring and the H atom; V1 is the vector normal to the plane through the ring;  $\beta$  is the C—H $\cdots$ CG angle;  $\alpha$  is the angle between V1 and V2. All hydrogen atoms have been omitted for clarity except H17C. Color of atoms (C green; O red; S yellow; Zn grey, and H black).

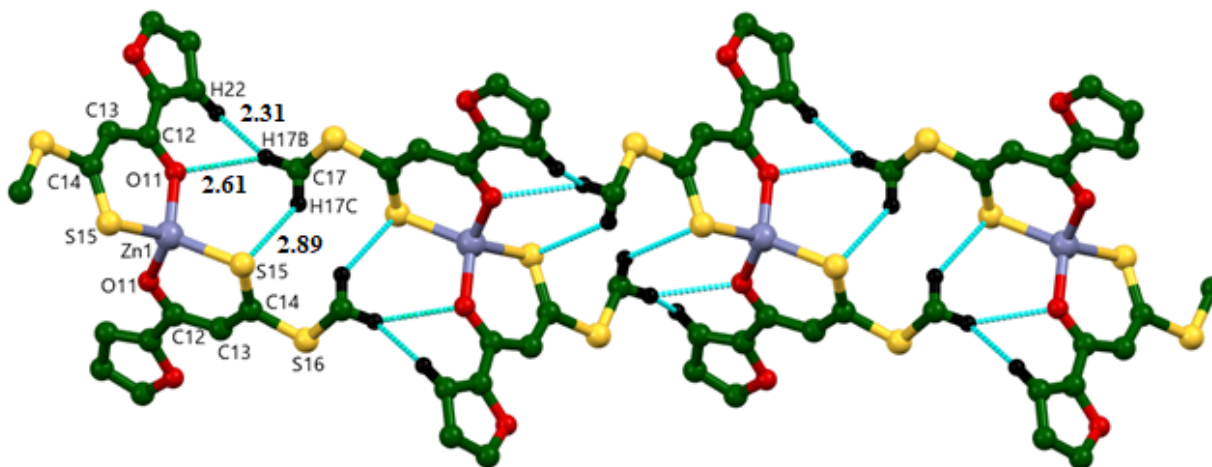

**Figure S13.** Supramolecular structure of complex **1** sustained by C—H $\cdots$ O, C—H $\cdots$ S and C—H $\cdots$ H—C interactions. Only the major component of the -SMe group is shown. All hydrogen atoms except for H17C and H17B have been omitted for clarity. Colour coding of atoms (C green; O red; S yellow; Zn grey, and H black).

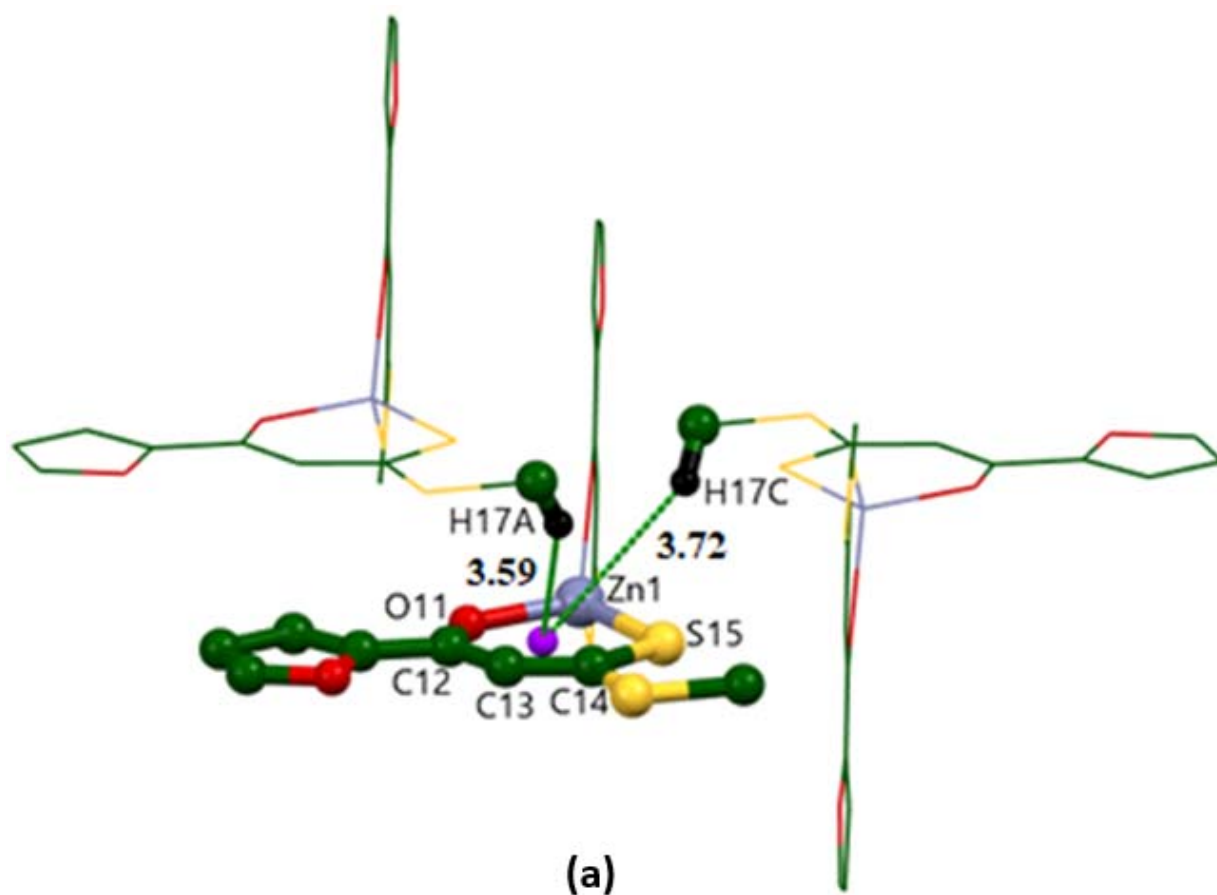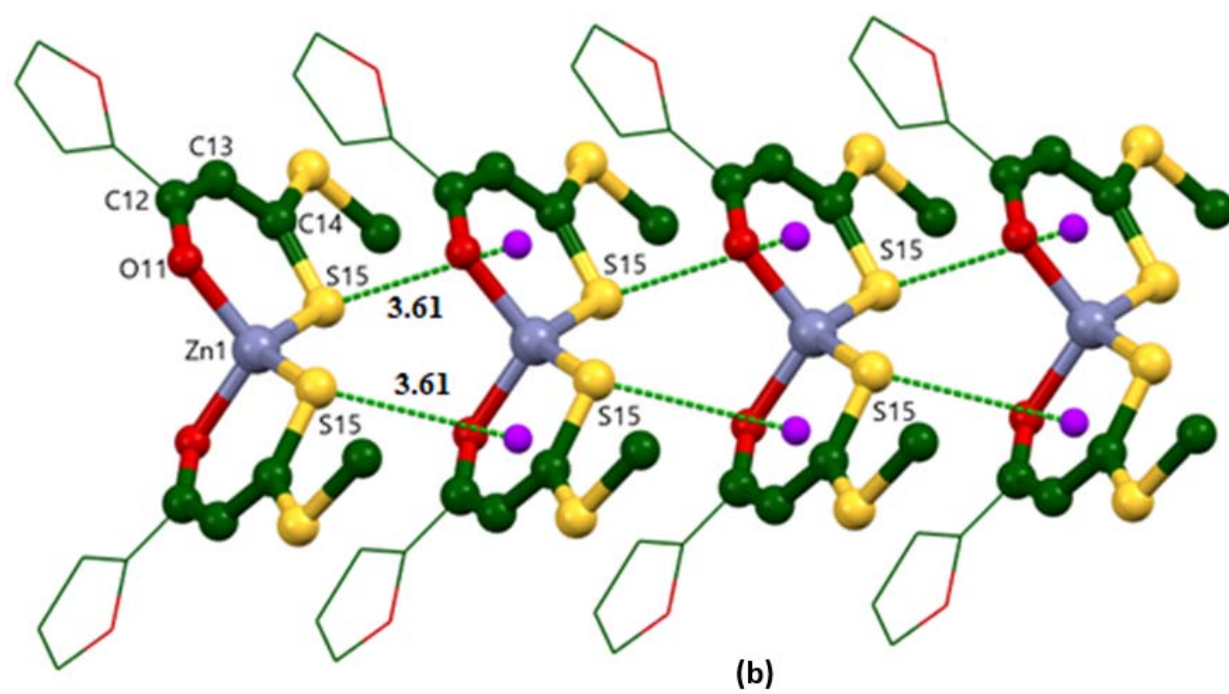

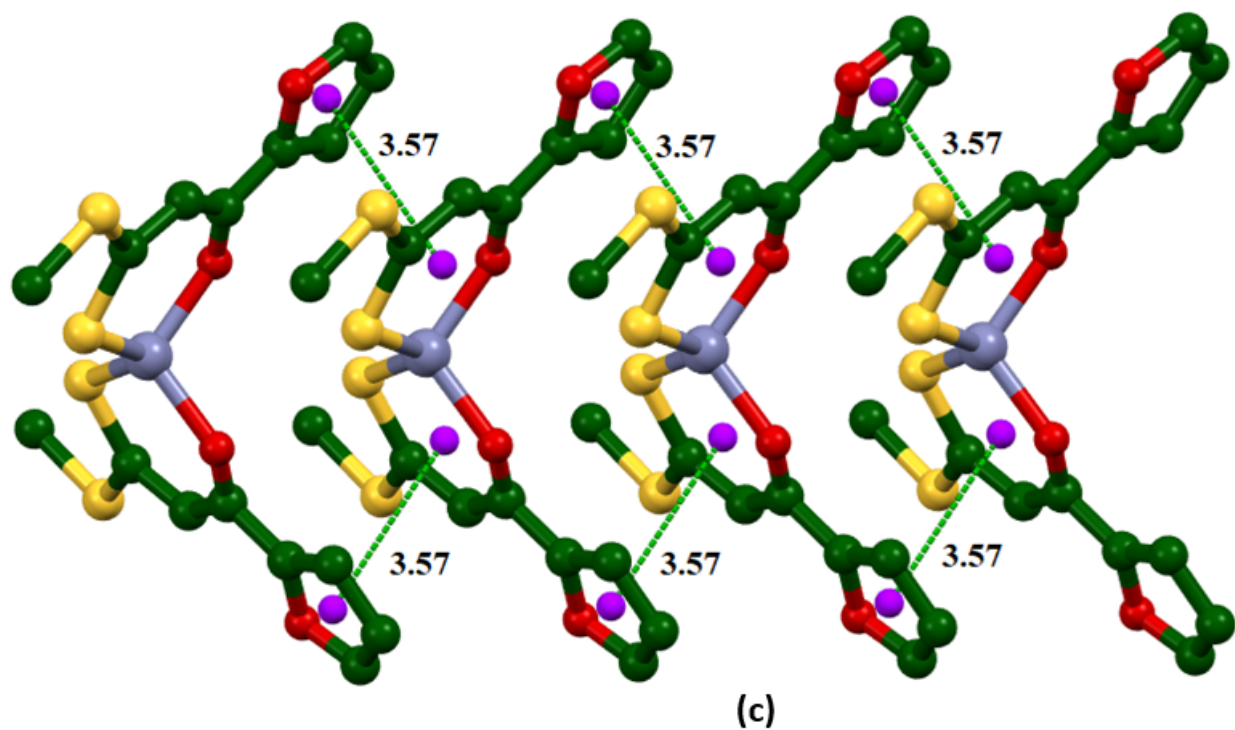

**Figure S14.** Supramolecular structure of complex 1 sustained by (a)  $\text{C}-\text{H} \cdots \pi$  ( $\text{ZnOSC}_3$ , chelate), (b)  $\text{C}-\text{S} \cdots \pi$  ( $\text{ZnOSC}_3$ , chelate), and (c)  $\pi \cdots \pi$  ( $\text{ZnOSC}_3$ ,) interactions. Only the major component of the -SMe group is shown. All hydrogen atoms have been omitted for clarity. Colour coding of atoms (C green; O red; S yellow; Zn grey).

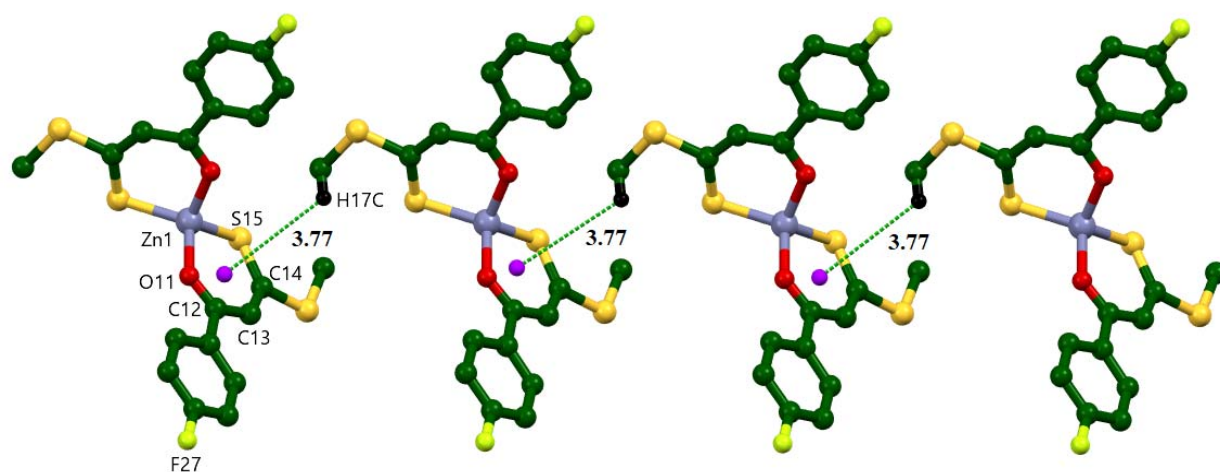

**Figure S15.** Supramolecular structure of complex 2 sustained by  $\text{C}-\text{H} \cdots \pi$  ( $\text{ZnOSC}_3$ , chelate) interactions. All hydrogen atoms except for H17C have been omitted for clarity. Colour coding of atoms (C green; O red; S yellow; Zn grey, and H black).

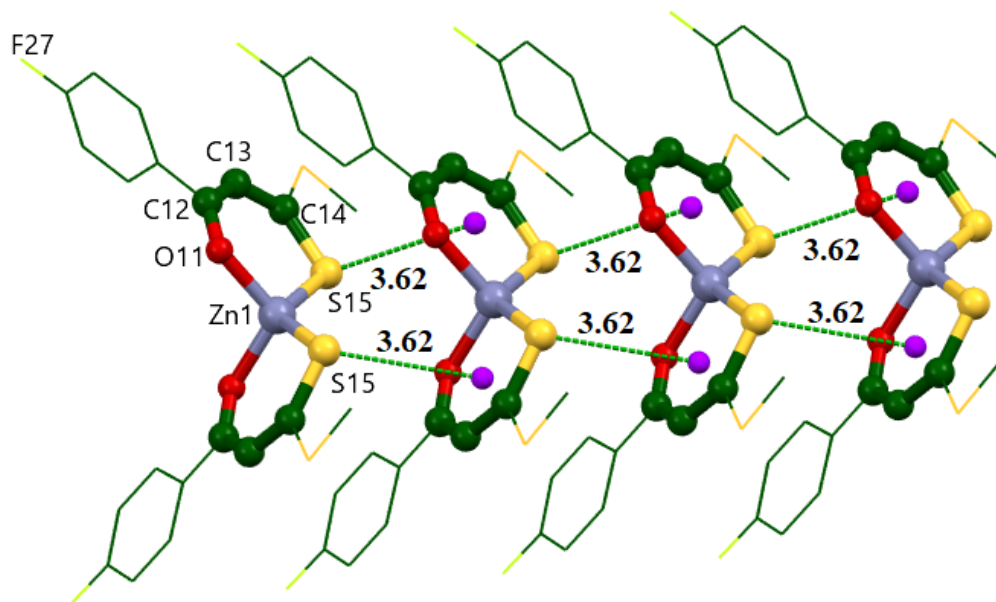

**Figure S16.** Supramolecular structure of complex **2** sustained by C—S $\cdots$  $\pi$  (ZnOSC<sub>3</sub>, chelate) interactions. All hydrogen atoms have been omitted for clarity except H17C. Colour coding of atoms (C green; O red; S yellow; Zn grey).

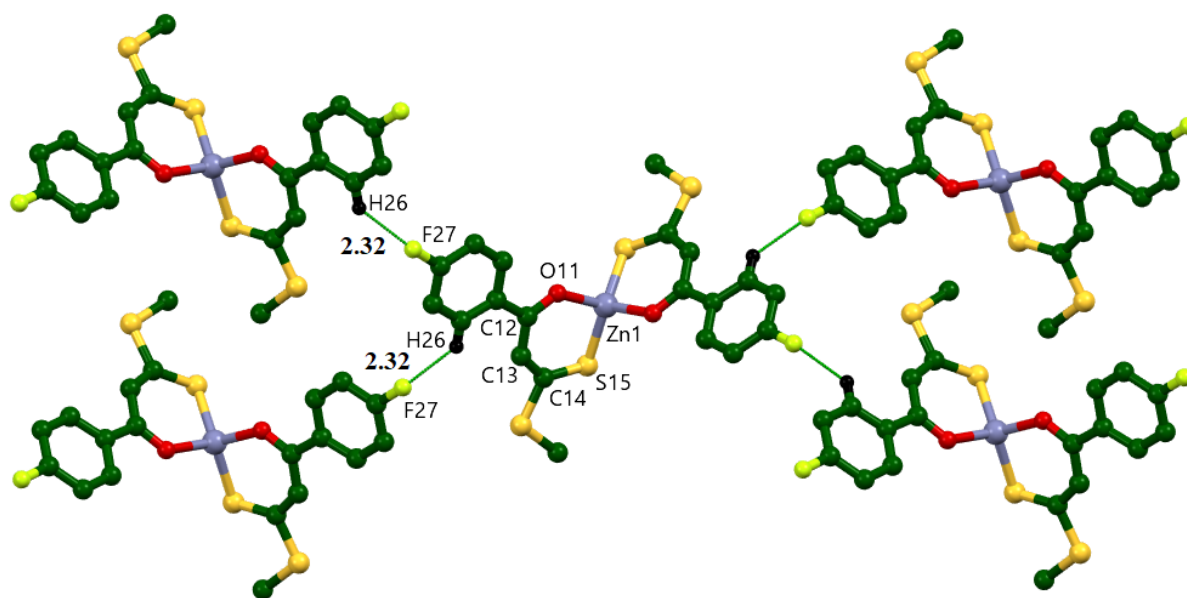

**Figure S17.** Supramolecular structure of complex **2** sustained by C—H $\cdots$ F—C interactions. All hydrogen atoms except for H26 have been omitted for clarity. Colour coding of atoms (C green; O red; S yellow; F lime green; Zn grey, and H black).



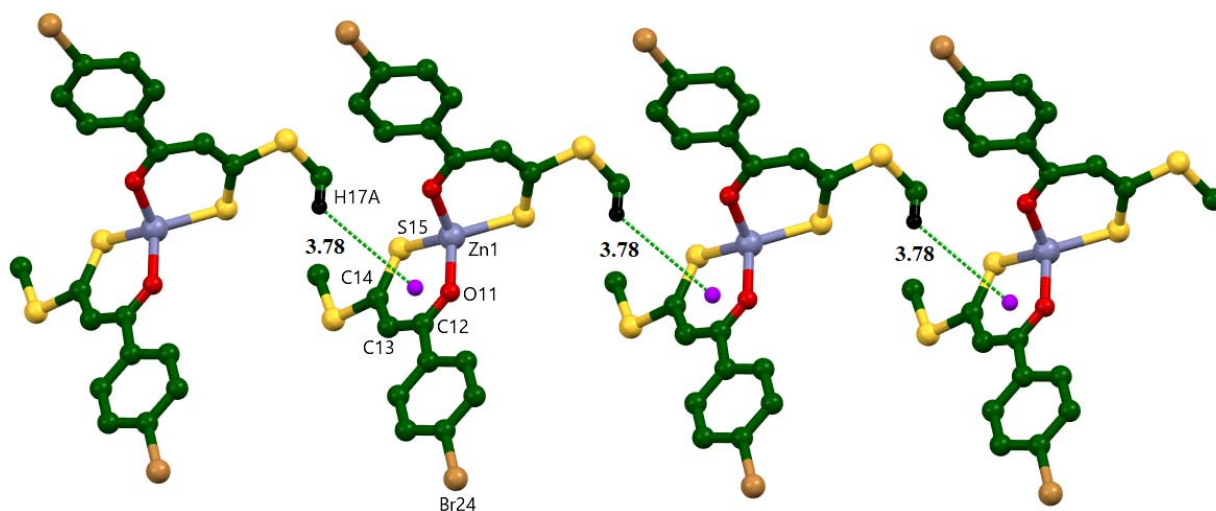

**Figure S18.** Supramolecular structure of complex **4** sustained by C—H $\cdots$  $\pi$  (ZnOSC<sub>3</sub>, chelate) interactions. All hydrogen atoms for except H17A have been omitted for clarity. Colour coding of atoms (C green; O red; S yellow; Br brown; Zn grey, and H black).

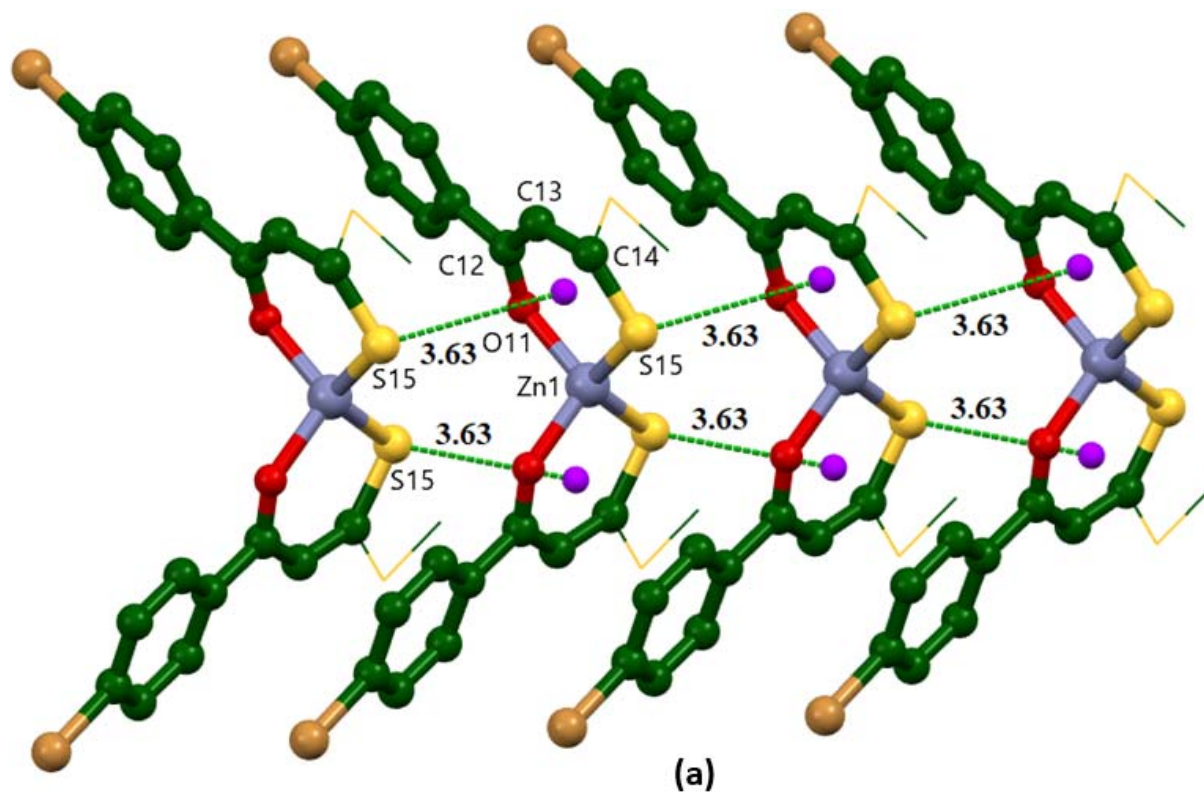

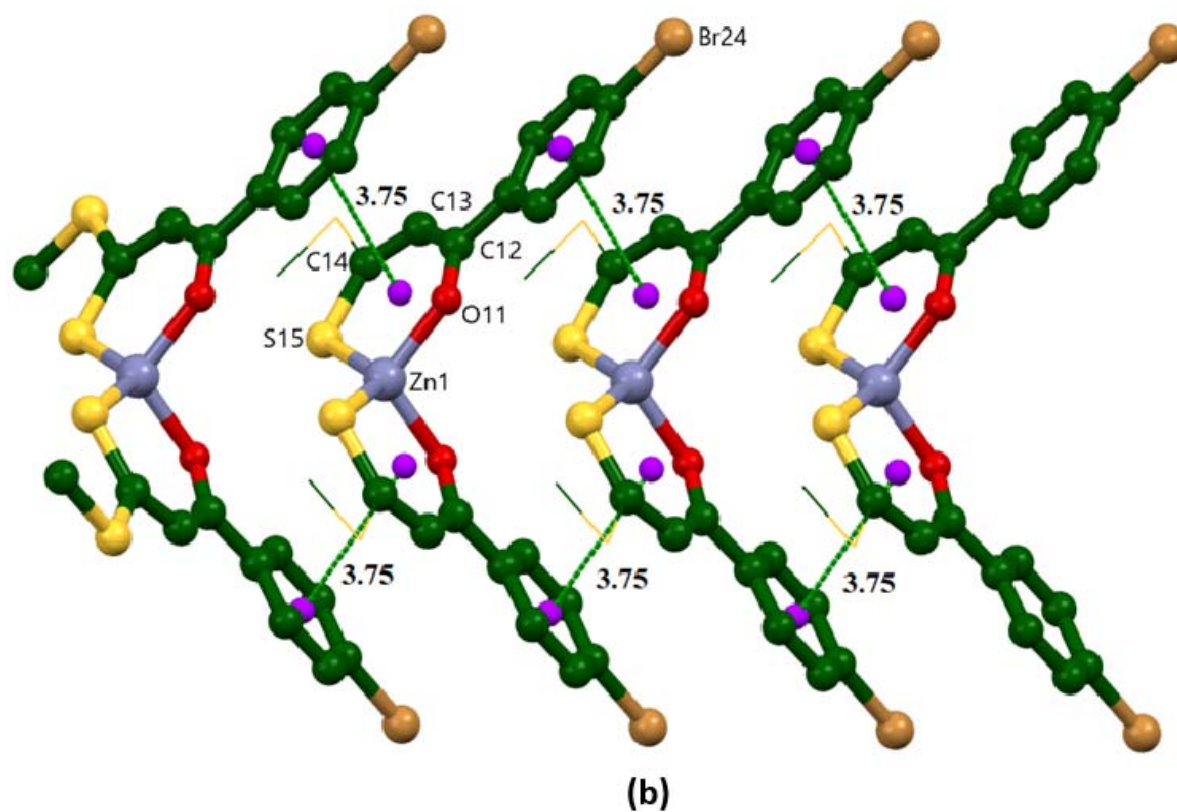

**Figure S19.** Supramolecular structure of complex **4** sustained by (a) C—S $\cdots\pi$  (ZnOSC<sub>3</sub>, chelate) and (b)  $\pi \cdots \pi$ (ZnOSC<sub>3</sub>) interactions. All hydrogen atoms have been omitted for clarity. Colour coding of atoms (C green; O red; S yellow; Br brown; Zn grey).
